# Supplementary material for: Cross-platform normalization enables machine learning model training on microarray and RNA-seq data simultaneously
Source: PubMed Central journal article supplement (PMC9968332; doi:10.1038/s42003-023-04588-6), 2023-02-25
Supplement: 42003_2023_4588_MOESM2_ESM.pdf [file 42003_2023_4588_MOESM2_ESM.pdf]

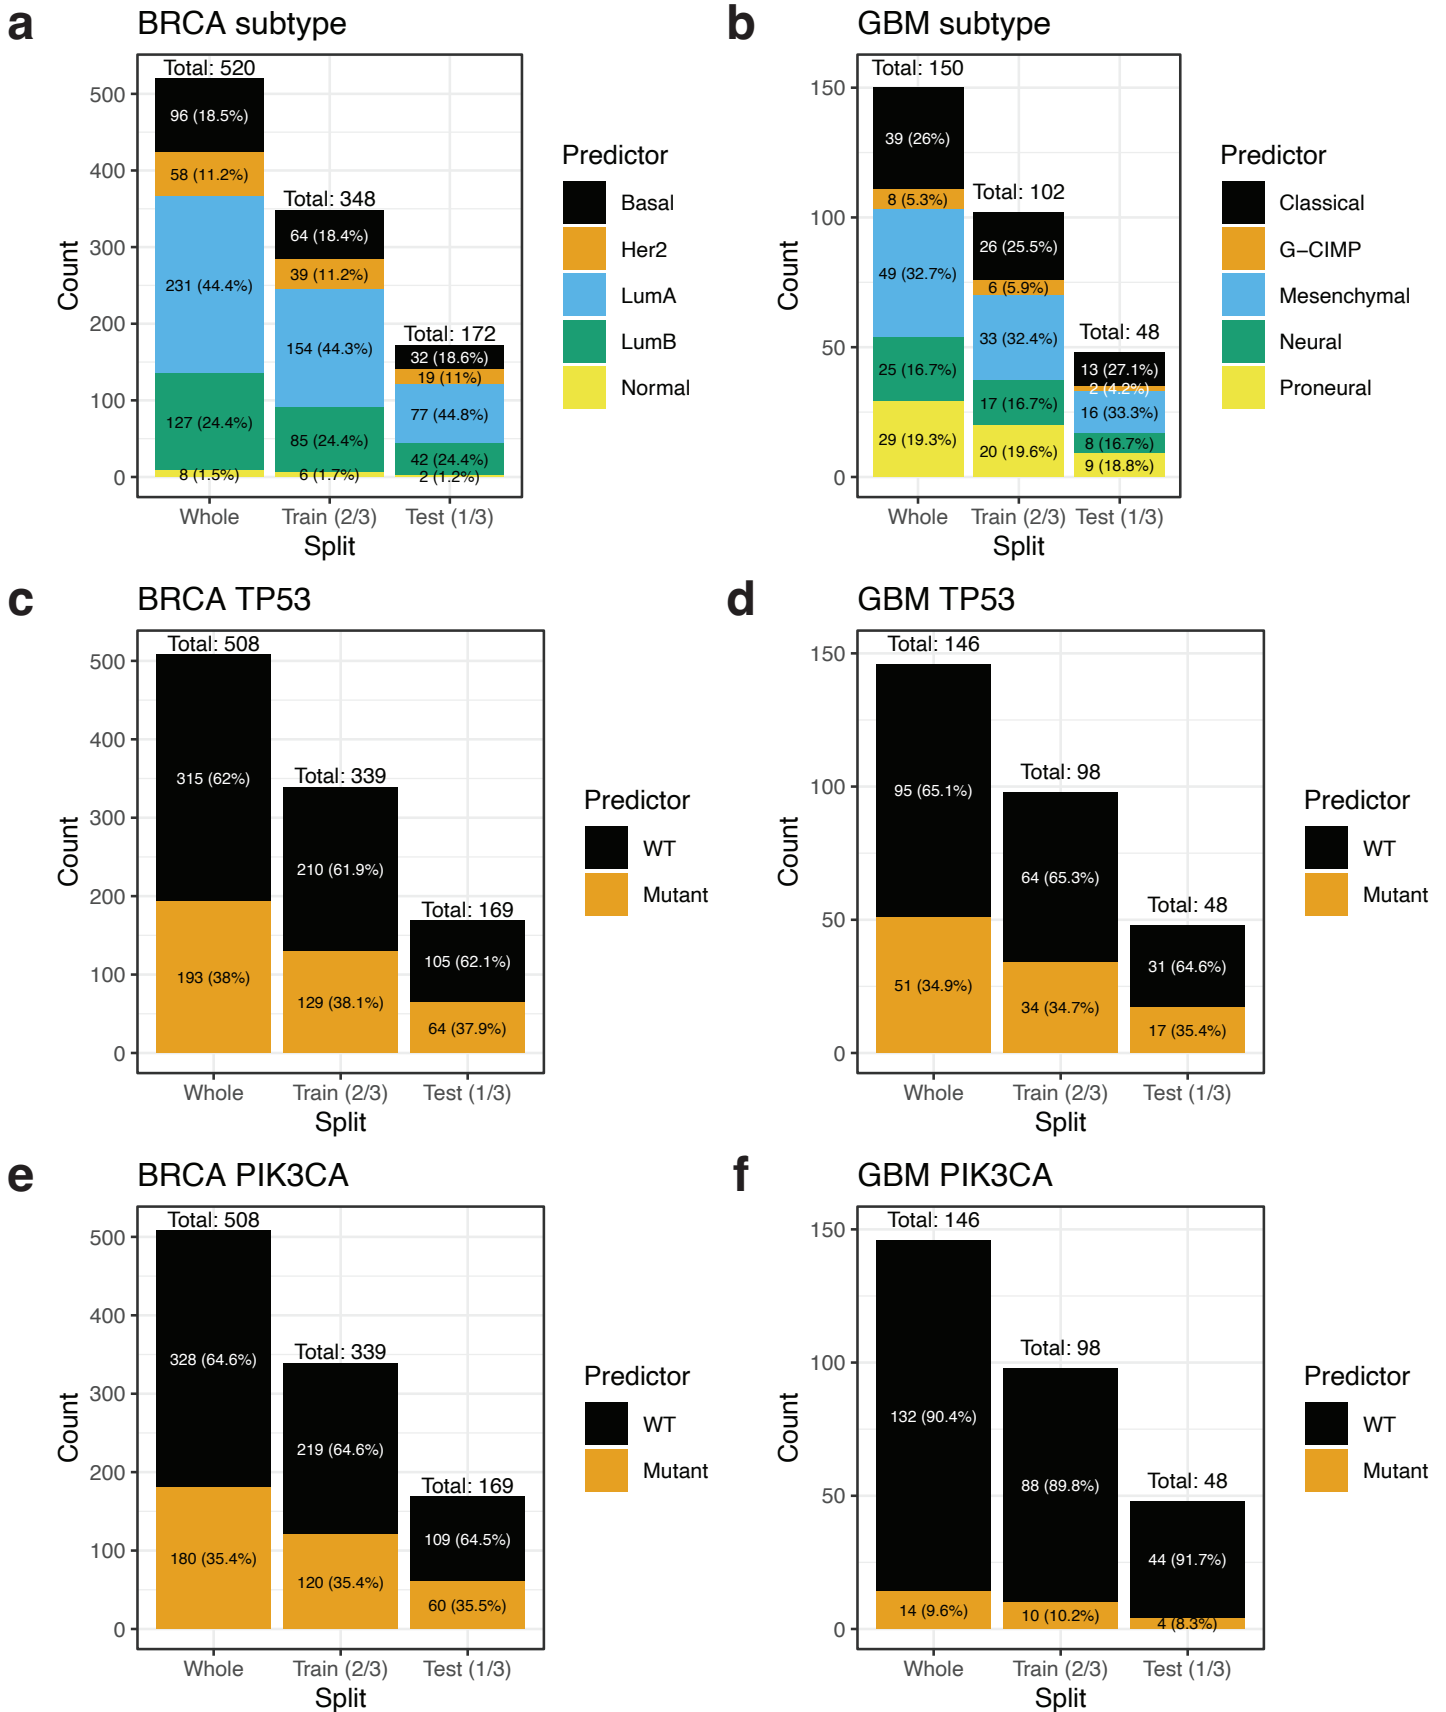

**Supplementary Figure 1. Predictor class balance in the whole set (all samples), training set (two-thirds), and test set (one-third).** (a) BRCA subtype. (b) GBM subtype. (c) BRCA *TP53* mutation status. (d) GBM *TP53* mutation status. (e) BRCA *PIK3CA* mutation status. (f) GBM *PIK3CA* mutation status.

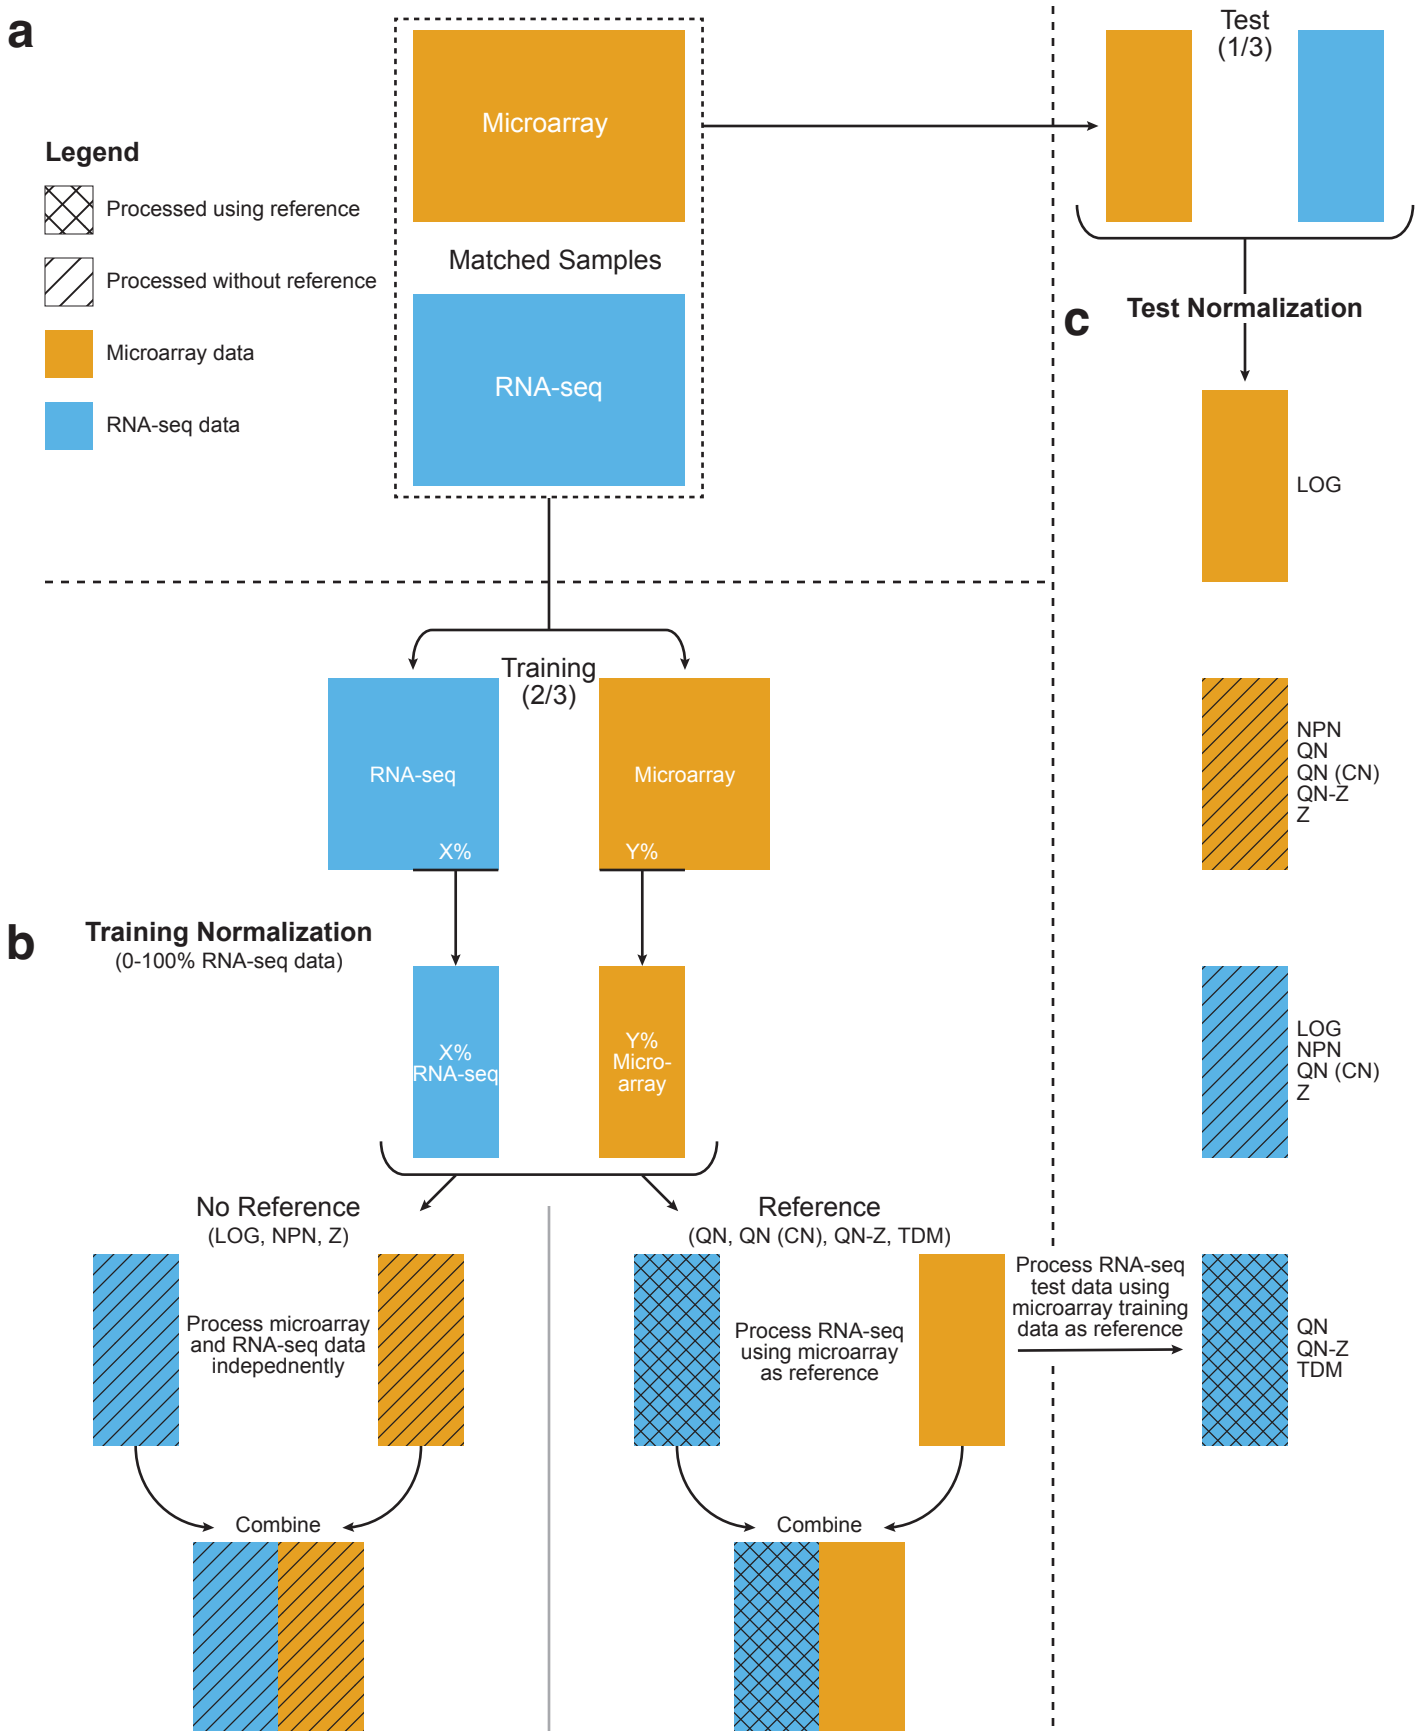

**Supplementary Figure 2. Overview of cross-platform normalization with and without reference.** (a) Matched samples are split into a training set and testing set. (b) Each training set is composed of between 0% and 100% RNA-seq data. For No Reference, the microarray portion and RNA-seq portion are normalized separately for LOG, NPN, and Z. With Reference, the microarray portion remains unprocessed (LOG) while the RNA-seq portion is normalized using the microarray portion as a reference distribution for QN, QN (CN), QN-Z, and TDM. Microarray and RNA-seq portions are then combined to form each cross-platform normalized training data set. (c) Microarray test data normalization occurs without reference for LOG, NPN, QN, QN (CN), QN-Z, and Z, and without reference for RNA-seq data for LOG, NPN, QN (CN), and Z. RNA-seq test data normalization uses microarray training data as the reference distribution for QN, QN-Z, and TDM at each percentage of RNA-seq titration in training. (LOG - log2-transformed; NPN - nonparanormal normalization; QN - quantile normalization; QN (CN) - quantile normalization with CrossNorm; QN-Z - quantile normalization followed by z-score; TDM - Training Distribution Matching; UN - untransformed; Z - z-score)

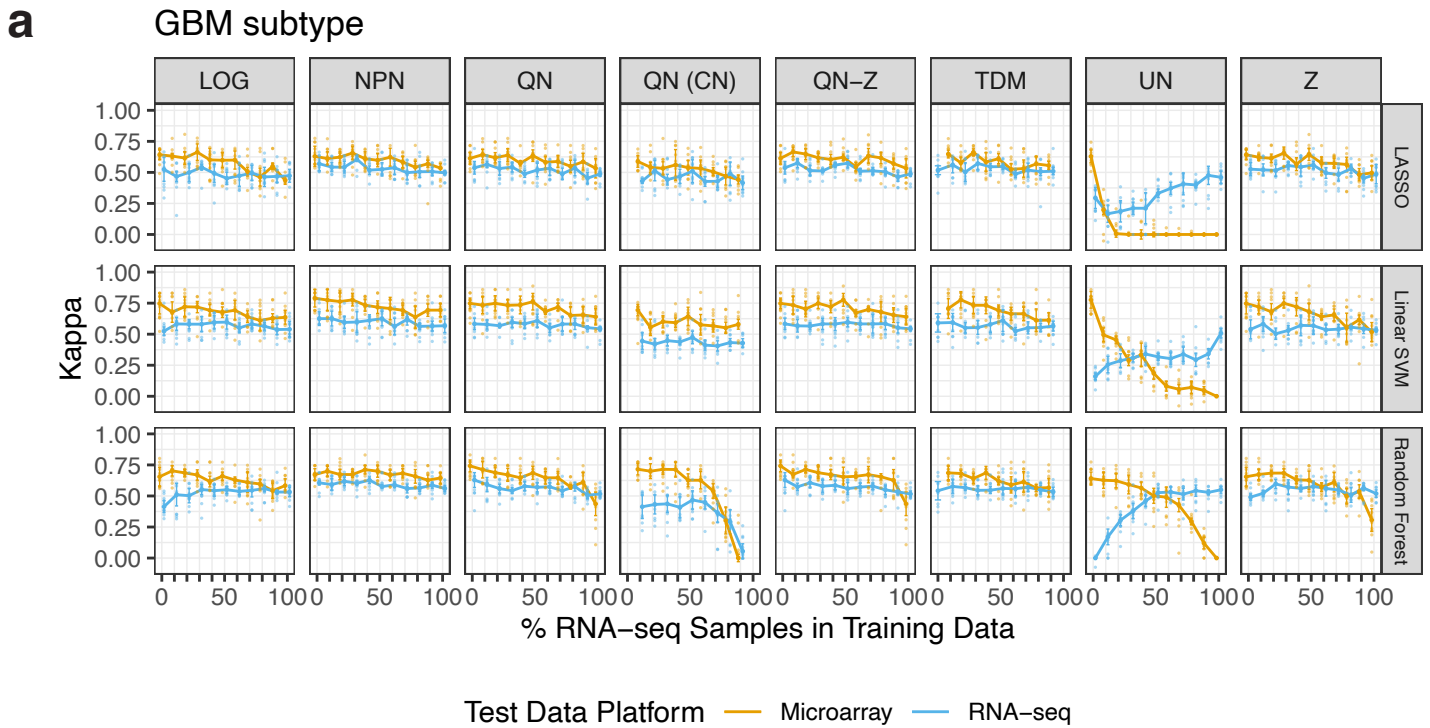

**Supplementary Figure 3. GBM subtype classifier performance on microarray and RNA-seq test data.** (a) Median Kappa statistics from 10 repeats of steps 1-3A from Figure 1 and for seven normalization methods (and untransformed data) are displayed. Median values are shown as points, and approximate 95% confidence intervals are shown around each median defined as  $\pm 1.58 \cdot \text{IQR} / \sqrt{n}$  with IQR = interquartile range and  $n$  = number of observations.<sup>60</sup> (LOG - log2-transformed; NPN – nonparanormal normalization; QN – quantile normalization; QN (CN) – quantile normalization with CrossNorm; QN-Z – quantile normalization followed by z-score; TDM – Training Distribution Matching; UN – untransformed; Z – z-score)

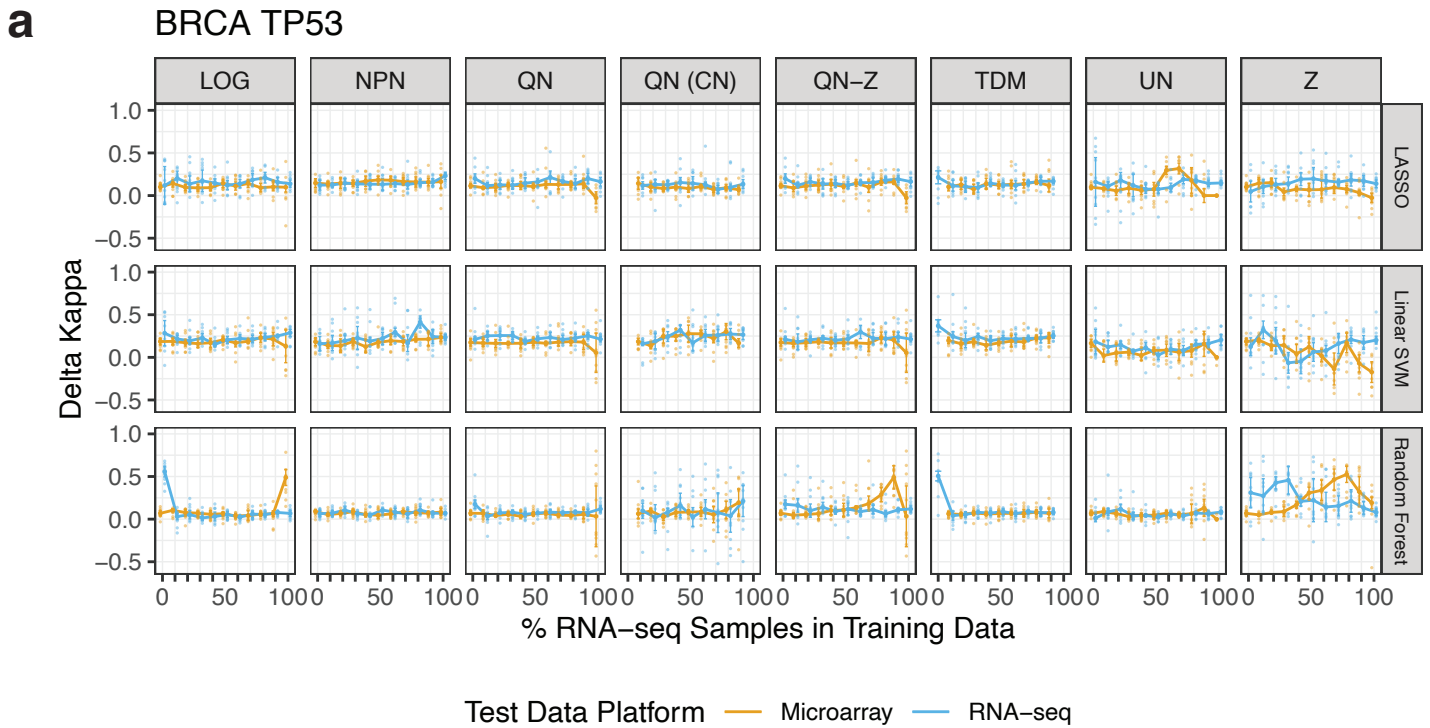

**Supplementary Figure 4. BRCA TP53 mutation classifier performance on microarray and RNA-seq test data.** (a) Median delta Kappa statistics from 10 repeats of steps 1-3A from Figure 1 and for seven normalization methods (and untransformed data) are displayed. Median values are shown as points, and approximate 95% confidence intervals are shown around each median defined as  $\pm 1.58 \cdot \text{IQR} / \sqrt{n}$  with IQR = interquartile range and  $n$  = number of observations.<sup>60</sup> Delta Kappa measures the difference in Kappa values between a null model and a model built with true labels. (LOG - log2-transformed; NPN – nonparanormal normalization; QN – quantile normalization; QN (CN) – quantile normalization with CrossNorm; QN-Z – quantile normalization followed by z-score; TDM – Training Distribution Matching; UN – untransformed; Z – z-score)

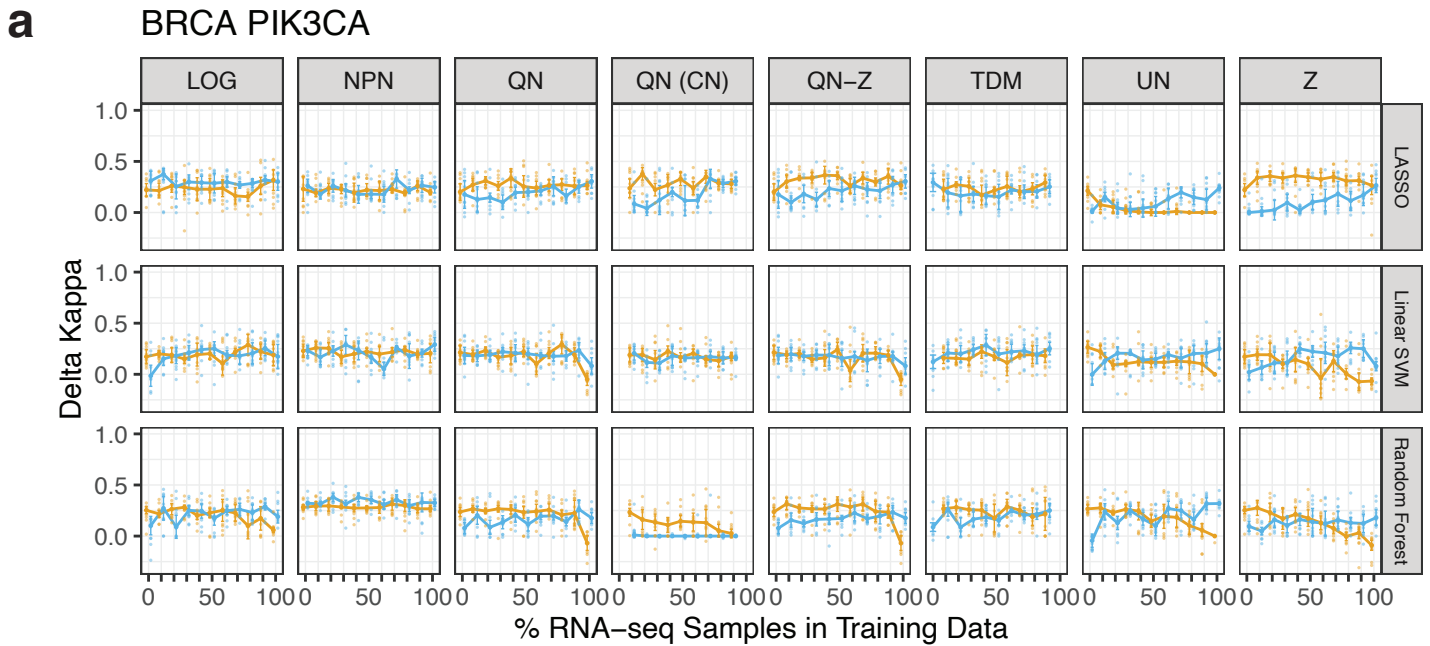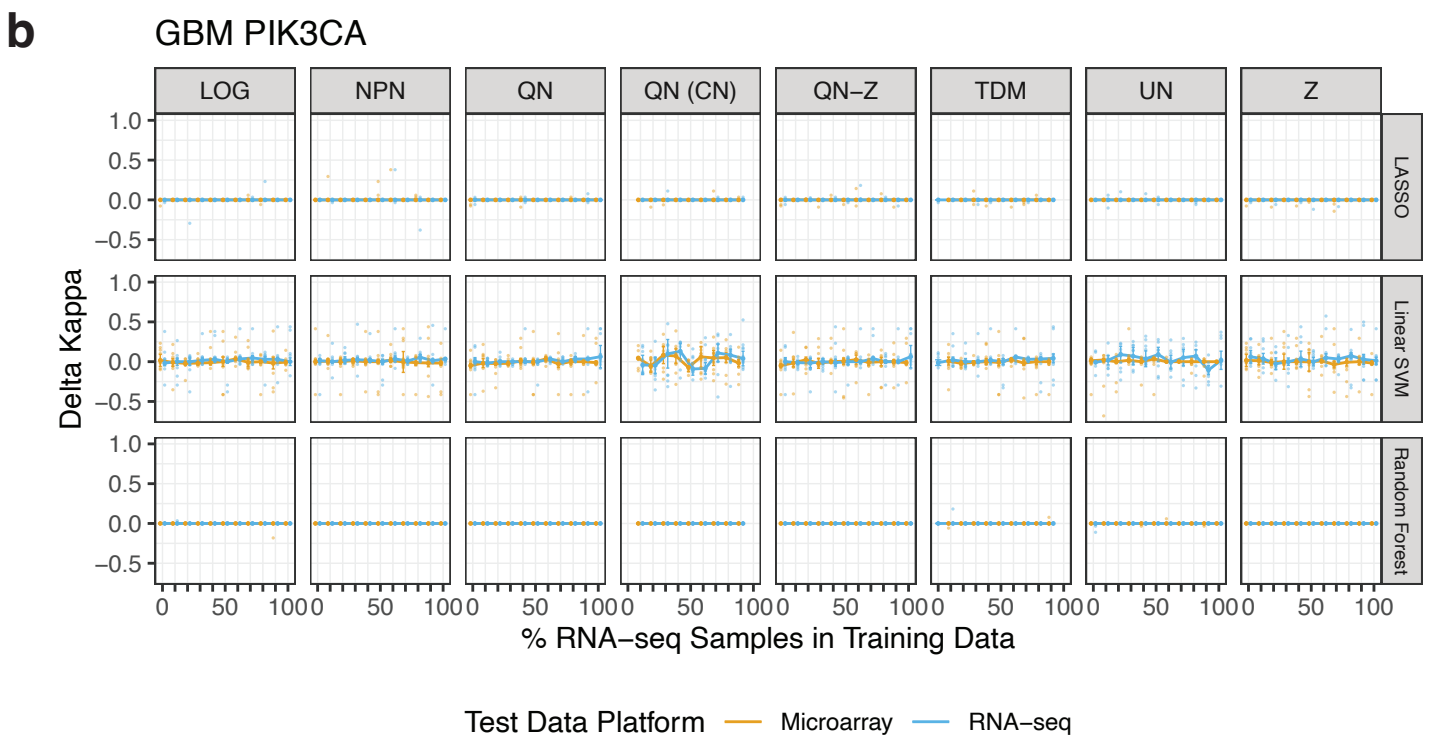

**Supplementary Figure 5. Mutation classifier performance on microarray and RNA-seq test data in (a) BRCA *PIK3CA* and (b) GBM *PIK3CA*.** Median delta Kappa statistics from 10 repeats of steps 1-3A from Figure 1 and for seven normalization methods (and untransformed data) are displayed. Median values are shown as points, and approximate 95% confidence intervals are shown around each median defined as  $\pm 1.58 \cdot \text{IQR} / \sqrt{n}$  with IQR = interquartile range and  $n$  = number of observations.<sup>60</sup> Delta Kappa measures the difference in Kappa values between a null model and a model built with true labels. (LOG - log2-transformed; NPN - nonparanormal normalization; QN - quantile normalization; QN (CN) - quantile normalization with CrossNorm; QN-Z - quantile normalization followed by z-score; TDM - Training Distribution Matching; UN - untransformed; Z - z-score)

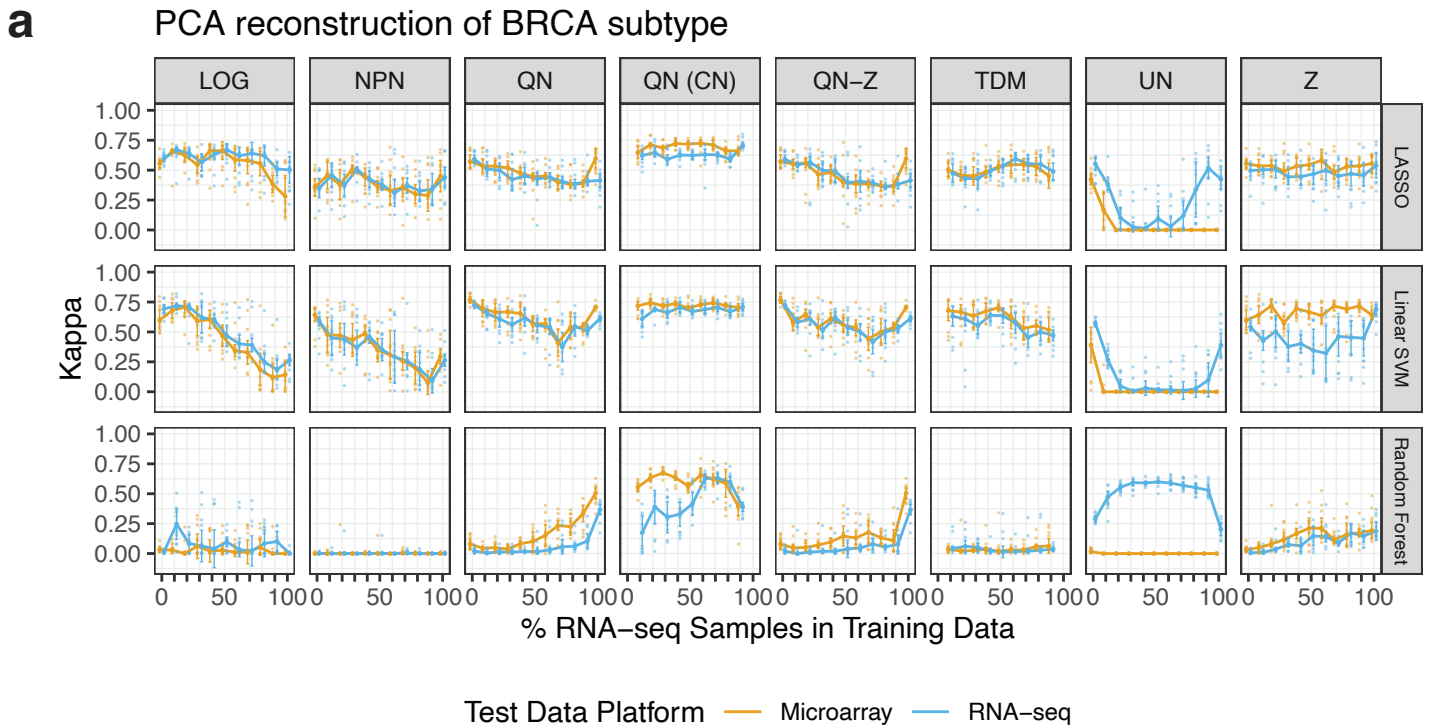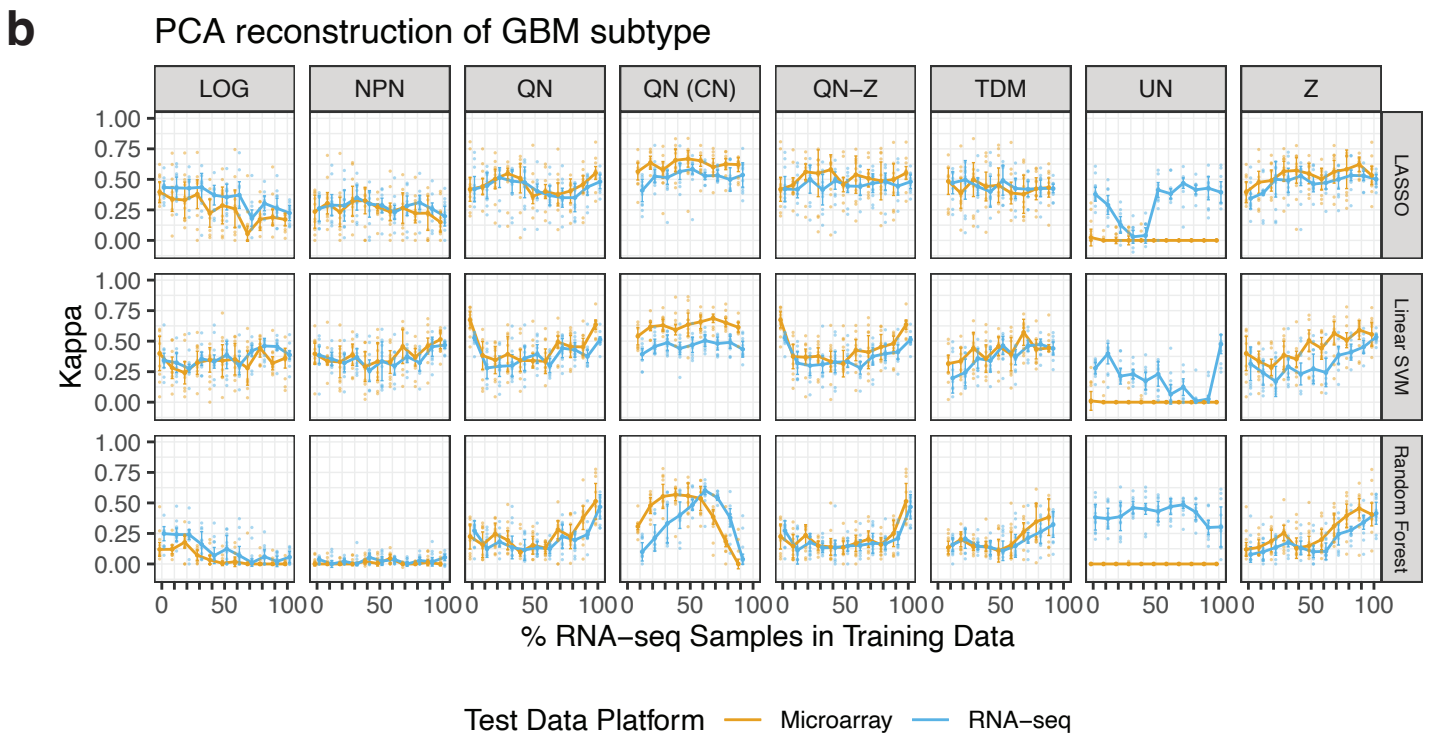

**Supplementary Figure 6. Subtype classifier performance on reconstructed microarray and RNA-seq test data from (a) BRCA and (b) GBM.** Median Kappa statistics from 10 repeats of steps 1-3A and 3B from Figure 1 and for seven normalization methods (and untransformed data) are displayed. Median values are shown as points, and approximate 95% confidence intervals are shown around each median defined as  $\pm 1.58 \cdot \text{IQR} / \sqrt{n}$  with IQR = interquartile range and  $n$  = number of observations.<sup>60</sup> (LOG - log2-transformed; NPN – nonparanormal normalization; QN – quantile normalization; QN (CN) – quantile normalization with CrossNorm; QN-Z – quantile normalization followed by z-score; TDM – Training Distribution Matching; UN – untransformed; Z – z-score)

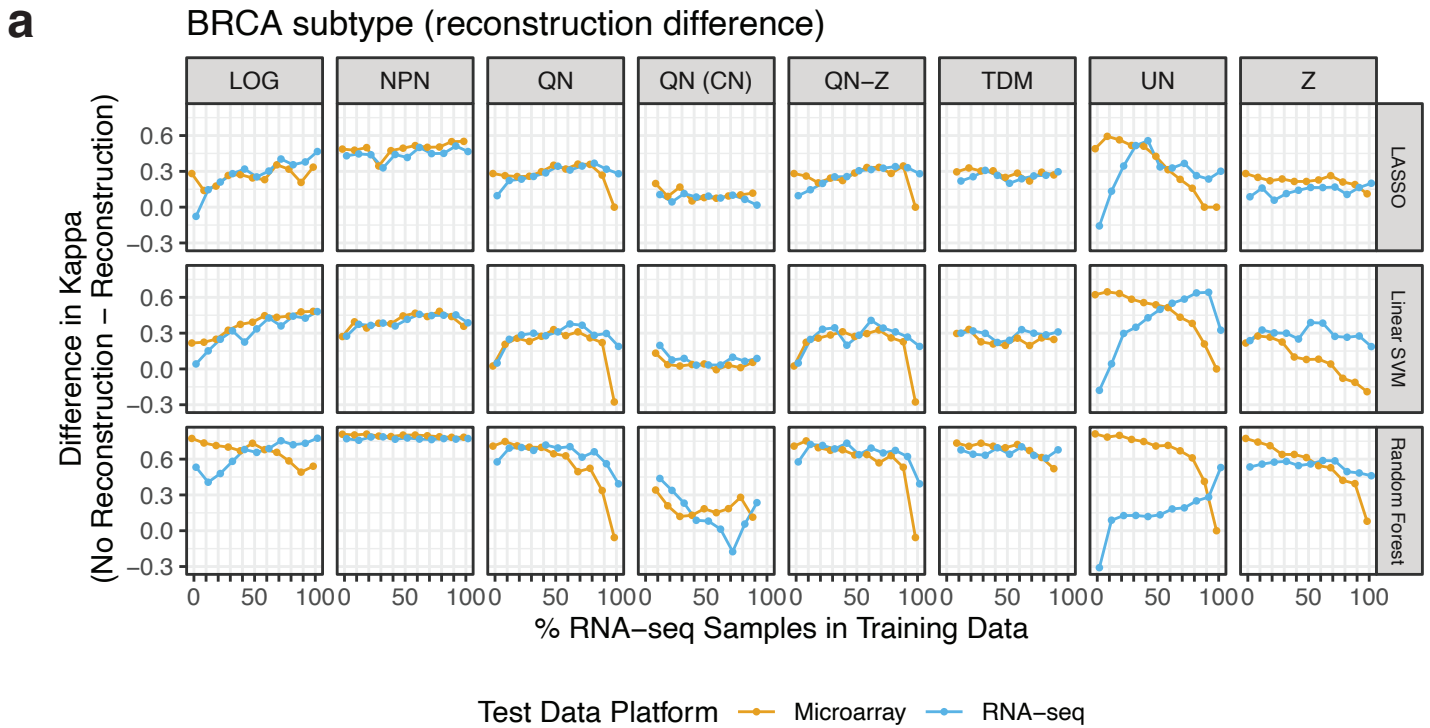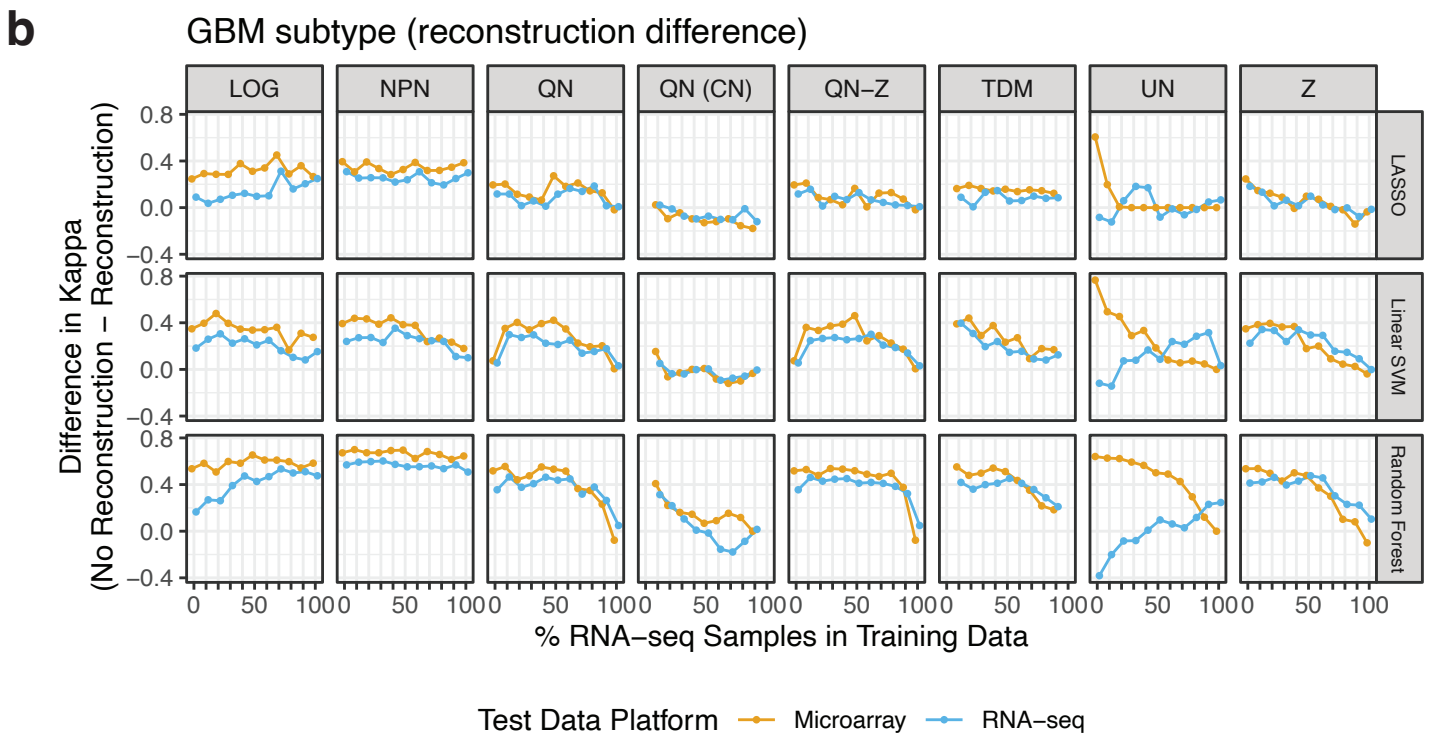

**Supplementary Figure 7. Difference in subtype classifier Kappa values between non-reconstructed and reconstructed microarray and RNA-seq test data from (a) BRCA and (b) GBM.** Line plots of the median difference in Kappa statistics from 10 repeats of steps 1-3A and 3B from Figure 1 and for seven normalization methods (and untransformed data) are displayed. Median values are shown as points. (LOG - log2-transformed; NPN - nonparanormal normalization; QN - quantile normalization; QN (CN) - quantile normalization with CrossNorm; QN-Z - quantile normalization followed by z-score; TDM - Training Distribution Matching; UN - untransformed; Z - z-score)

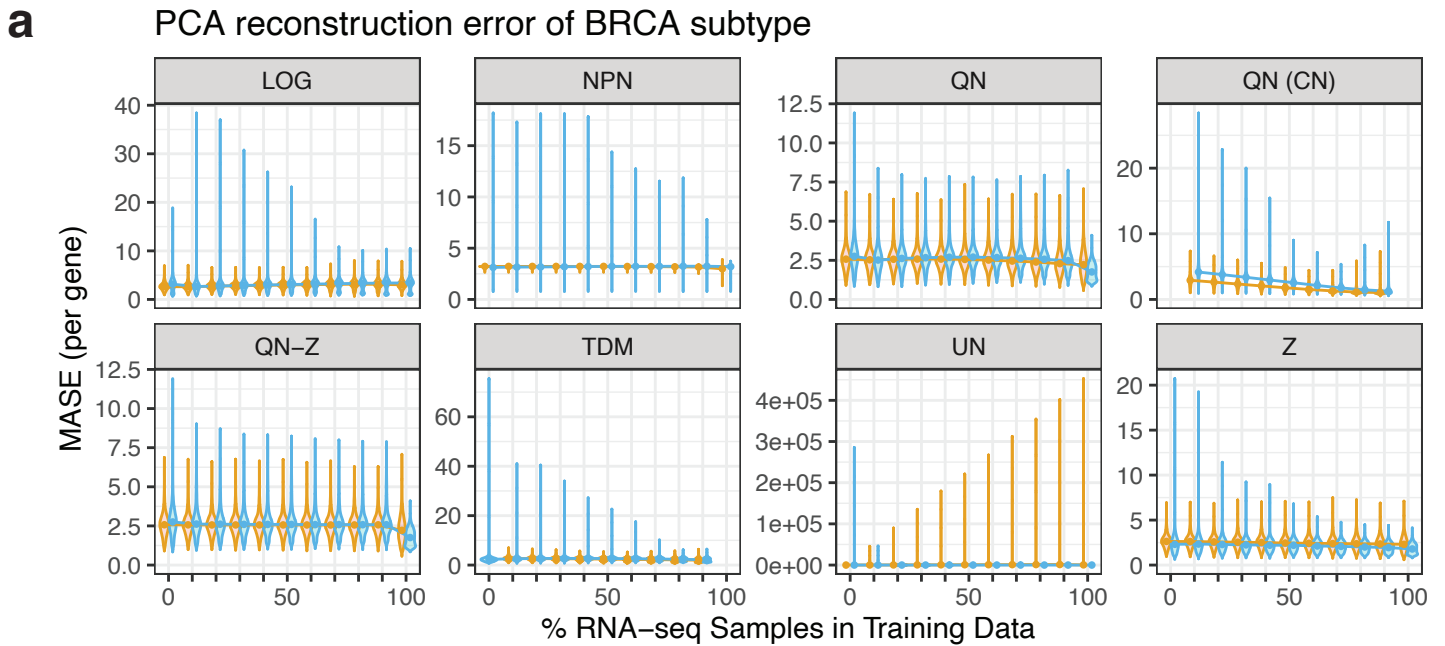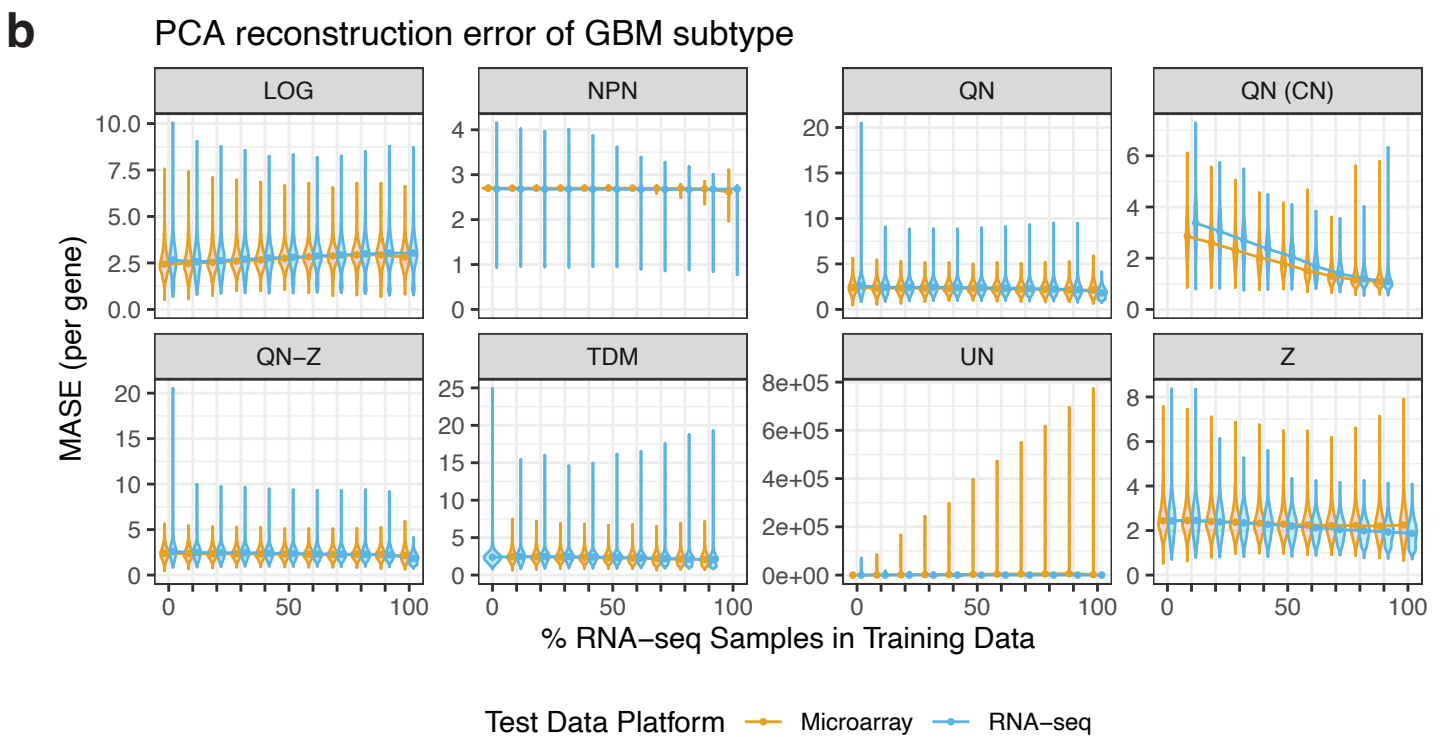

**Supplementary Figure 8. Subtype classifier mean absolute squared error (MASE) on reconstructed microarray and RNA-seq test data from (a) BRCA and (b) GBM.** Violin plots of per gene MASE values from 10 repeats of steps 1-3A and 3B from Figure 1 and for seven normalization methods (and untransformed data) are displayed. Median values are shown as points. (LOG - log2-transformed; NPN – nonparanormal normalization; QN – quantile normalization; QN (CN) – quantile normalization with CrossNorm; QN-Z – quantile normalization followed by z-score; TDM – Training Distribution Matching; UN – untransformed; Z – z-score)
