# Supplementary material for: Cross-platform normalization enables machine learning model training on microarray and RNA-seq data simultaneously
Source: PubMed Central journal article supplement (PMC9968332; doi:10.1038/s42003-023-04588-6), 2023-02-25
Supplement: 42003_2023_4588_MOESM3_ESM.pdf [file 42003_2023_4588_MOESM3_ESM.pdf]

## Description of Additional Supplementary Files

**File name:** Supplementary Data 1

**Description:** Model performance metrics for each prediction task by cancer type, predictor, percentage RNA-seq, classifier used, normalization method, and test data platform

**File name:** Supplementary Data 2

**Description:** Pathway-Level Information Extractor (PLIER) results for breast cancer (BRCA), separated by normalization method (nmeth), percentage RNA-seq (pseq), and replication seed index (seed\_index)

**File name:** Supplementary Data 3

**Description:** Pathway-Level Information Extractor (PLIER) results for glioblastoma (GBM), separated by normalization method (nmeth), percentage RNA-seq (pseq), and replication seed index (seed\_index)
